# Supplementary material for: Isotopic signatures of iron in body tissues as a potential biomarker for iron metabolism
Source: Royal Society of Chemistry journal article supplement (doi:10.1039/c0ja00195c), 2011-01-01
Supplement: c0ja00195c.pdf [file c0ja00195c.pdf]

## ELECTRONIC SUPPLEMENTARY INFORMATION (1)

**Table S1:** Instrumental settings for measurement of iron isotope ratios using a Thermo Finnigan NEPTUNE MC-ICP-MS.

| Parameters                     | Settings    |
|--------------------------------|-------------|
| sample gas flow (l/min)        | 0.960-1.010 |
| auxiliary gas flow (l/min)     | 0.70-0.75   |
| cool gas flow (l/min)          | 15          |
| RF power (W)                   | 1200        |
| sample uptake time (min)       | 2           |
| acceleration voltage (V)       | -10'000     |
| number of cycles per run       | 20          |
| integration time per cycle (s) | 8           |
| entrance slit resolution       | medium      |

## ELECTRONIC SUPPLEMENTARY INFORMATION (2)

**Table S2:** Iron isotopic composition of iron sources and tissue samples.

| SAMPLE                                   | IRON ISOTOPE COMPOSITION |   |       |   |
|------------------------------------------|--------------------------|---|-------|---|
|                                          | $\delta(^{56}\text{Fe})$ |   | 2 SD  |   |
| <b>Iron sources during breeding</b>      |                          |   |       |   |
| IV ferric dextrane                       | +0.18                    | ± | 0.04  | ‰ |
| starter diet                             | -0.08                    | ± | 0.18  | ‰ |
| regular diet                             | -0.05                    | ± | 0.10  | ‰ |
| <b>Organs of the systemic iron cycle</b> |                          |   |       |   |
| blood                                    | -1.75                    | ± | 0.06  | ‰ |
| liver                                    | -0.38                    | ± | 0.04  | ‰ |
| red bone marrow                          | -0.61                    | ± | 0.12  | ‰ |
| spleen                                   | -0.35                    | ± | 0.06  | ‰ |
| <b>Muscles</b>                           |                          |   |       |   |
| Skeletal muscles, average                | -1.51                    | ± | 0.10  | ‰ |
| abdominal muscle                         | -1.55                    | ± | 0.08  | ‰ |
| extensor (front leg)                     | -1.46                    | ± | 0.10  | ‰ |
| fillet                                   | -1.55                    | ± | 0.06  | ‰ |
| triceps (front leg)                      | -1.45                    | ± | 0.06  | ‰ |
| quadriceps (hind leg)                    | -1.56                    | ± | 0.08  | ‰ |
| Smooth muscles, average                  | -1.61                    | ± | 0.16  | ‰ |
| diaphragm                                | -1.68                    | ± | 0.04  | ‰ |
| esophageal muscle                        | -1.53                    | ± | 0.08  | ‰ |
| gastric muscle                           | -1.61                    | ± | 0.02  | ‰ |
| Cardiac muscle                           | -1.65                    | ± | 0.08  | ‰ |
| <b>Brain</b>                             |                          |   |       |   |
| Total brain, weighted mean               | -1.52                    | ± | 0.02  | ‰ |
| cerebellum                               | -1.50                    | ± | 0.04* | ‰ |
| brainstem part of hindbrain              | -1.41                    | ± | 0.10  | ‰ |
| mesencephalon                            | -1.44                    | ± | 0.06* | ‰ |
| neopallium                               | -1.52                    | ± | 0.08  | ‰ |
| paleopallium&archipallium                | -1.58                    | ± | 0.02* | ‰ |
| spinal cord (sample)                     | -1.44                    | ± | 0.02* | ‰ |
| <b>Endocrine organs</b>                  |                          |   |       |   |
| adrenal gland                            | -0.74                    | ± | 0.08  | ‰ |
| ovaries                                  | -0.98                    | ± | 0.13  | ‰ |
| pancreas                                 | -0.97                    | ± | 0.09  | ‰ |
| parotid gland                            | -0.78                    | ± | 0.06  | ‰ |
| thalamus/hypothalamus                    | -1.44                    | ± | 0.05  | ‰ |
| thymus                                   | -1.48                    | ± | 0.04  | ‰ |
| thyroid                                  | -1.20                    | ± | 0.07  | ‰ |
| <b>Other organs</b>                      |                          |   |       |   |
| kidneys                                  | -1.25                    | ± | 0.07  | ‰ |
| lungs                                    | -1.54                    | ± | 0.07  | ‰ |
| lymph nodes (jejunal)                    | -1.30                    | ± | 0.12* | ‰ |
| salivary gland                           | -0.98                    | ± | 0.05  | ‰ |
| urinary bladder                          | -1.38                    | ± | 0.20  | ‰ |
| uterine mucosa                           | -1.18                    | ± | 0.10  | ‰ |

\* 1 chemical replicate only
